# Supplementary material
Source: Springer Nature journal article supplement (https://www.springermedizin.de/resource/supplementary/13014_2006_40_MOESM1_ESM.pdf/9632786)

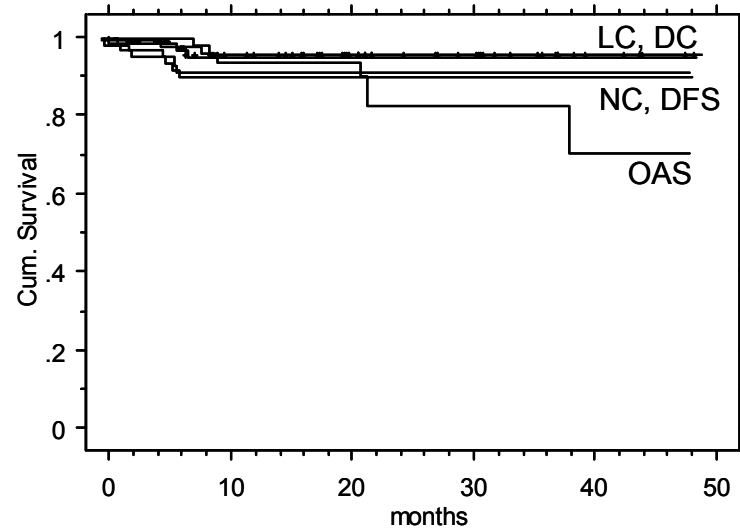

Figure 1a

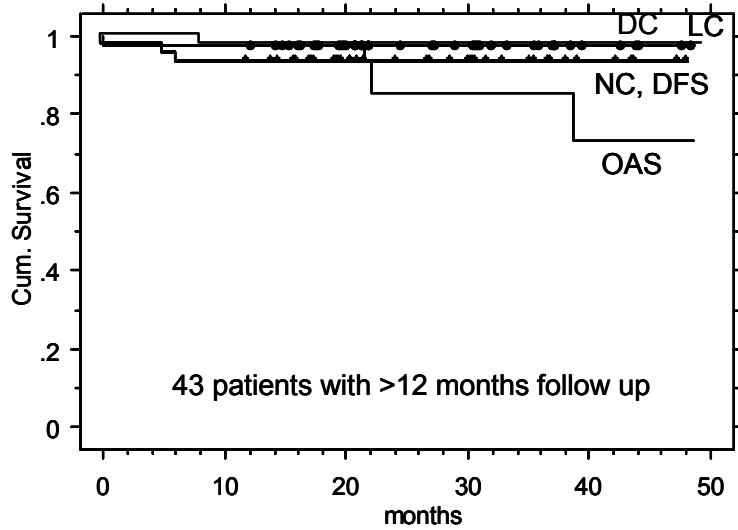

Figure 1b

Supplement: MOESM1 [file 9632786]
